# Supplementary material for: Online Home-Based Physical Activity Counteracts Changes of Redox-Status Biomarkers and Fitness Profiles during Treatment Programs in Postsurgery Female Breast Cancer Patients
Source: MDPI journal article supplement (doi:10.3390/antiox12051138), 2023-05-22
Supplement: s1 [file s1]

**Table S1.** Sequence of primers used for RT-qPCR analysis.

| Target gene   | Forward                     | Reverse                       |
|---------------|-----------------------------|-------------------------------|
| Cyclophilin A | 5'-GTCAACCCACGGTGTTCCTT-3'  | 5'-CTGCTGTCTTTGGGACCTTGT -3'  |
| HSP70         | 5'-AGGGGCCTTTCCAAGATTGC-3'  | 5'-GCAAACACAGGAAATTGAGAACT-3' |
| HSP27         | 5'-GCAGGACGAACATGGCTACAT-3' | 5'-TGGAGGCAGCGTGTATTTCC-3'    |
| SOD1          | 5'-AAAGATGGTGTGGCCGATGT-3'  | 5'-GCCAATGATGCAATGGTCTCC-3'   |
| SOD2          | 5'-CCCTGGAACCTCACATCAAC-3'  | 5'-GGTGACGTTTCAGGTTGTTCA-3'   |
| GPX1          | 5'-ACGATGTTGCCTGGAACCTT-3'  | 5'-TCGATGTCAATGGTCTGGAA-3'    |
